# Supplementary material
Source: PubMed Central journal article supplement (PMC9219596)

## Supplemental Figure Legends

### Supplemental Figure 1. p53<sup>-/-</sup> syngeneic TNBC GEM recapitulate human TNBC subtypes and respond to low dose immunostimulatory chemotherapy treatment.

**a**, Treatment response using standard of care drugs on T11 mammary tumors. **b**, Cibersort analysis of murine TNBC models. **c**, Single agent CTX treatment led to a reduced tumor burden in Balb/c mice as compared to NSG mice. Data are shown as mean +/-S.E.M, n = 10 per group except NSG PBS, n = 5. Multiple unpaired t tests were used to determine significance. **d**, Co-culture of GFP<sup>+</sup> T12 tumor cells and GFP targeting T cells with or without Phosphoramidate Mustard (PM). Each treatment was performed in triplicates and repeated twice. **e**, Flow cytometry analysis of CD8<sup>+</sup> and CD4<sup>+</sup> T cells before and after low-dose CTX treatment, n = 6-7 mice per group. **f**, Antibody depletion of CD4<sup>+</sup> T Cells leads to a significant decrease in response to CTX and increased tumor volumes while differences in response due to depletion of CD8<sup>+</sup> T Cells neared statistical significance at day 17, p = 0.06 n = 5-7 mice per group. Multiple unpaired t tests were used to determine significance. **g**, Quantification of TAMs upon antibody depletion of CD4<sup>+</sup> T cells after treatment and quantification of CD8<sup>+</sup> T cells after CD4<sup>+</sup> T cell depletion after treatment by single agent CTX. **h**, Quantification of F480<sup>+</sup>CSF1R<sup>+</sup> TAMs after combination treatment with CTX and Pexidartinib using flow cytometry, n= 5, significance was determined by unpaired t-tests. **i**, Quantification of CD8<sup>+</sup> T memory cell subsets before and after treatment, n = 4-5 mice per group. Unpaired t-test was used to determine significance. **j**, Reduced tumor volume and improved survival in T12 mammary tumor bearing mice after treatment with CTX and 3.3X lower PXB (75 ppm). Number in parentheses show the specific n values of biologically independent mice per treatment group **k**, Combination of low-dose CTX with SNDX-ms6352 leads to a reduced primary tumor burden of T12 and 2151R p53<sup>-/-</sup> GEMMs following 4 weekly treatments (arrows). **l**, Immunohistochemistry for F4/80<sup>+</sup> TAMs following 1 dose of IgG or SNDX-ms6352 treatment.

### Supplemental Figure 2. Combination therapy leads to an expansion of CD8<sup>+</sup>/CD4<sup>+</sup> T cells and B cells in responsive T12 tumors.

**a**, Imaging mass cytometry analysis of the tumor immune microenvironment in T11 tumors before and after treatment. Representative images overlaid with 7 markers (F480, Ly6C, Ly6G, CD11b, CD4, CD8a, B220) for each treatment group. **b**, Neighborhood analysis of T11 tumors in which the color of the squares indicates significant pairwise interactions or avoidance between PhenoGraph defined cellular metaclusters. Highlighted interactions include CD8<sup>+</sup>/CD4<sup>+</sup> T cells (clusters 1-7), B220<sup>+</sup> B cells(cluster-15) and CD11C<sup>+</sup> CD86<sup>+</sup> Dendritic cells (cluster 16). Three Regions of Interest (ROI) were ablated per tumor section. n= 3-5 independent biological replicates per treatment group. **c**, Representative IMC images of T12 and T11 tumors after combination therapy highlighting the spatial localization of CD8<sup>+</sup>/CD4<sup>+</sup> T cells and B cells with respect to proliferating KI67<sup>+</sup> cells and F480<sup>+</sup> TAMs. **d**, Flow cytometry quantification of F480<sup>+</sup> CSF1R<sup>+</sup> T12 and T11 tumor associated macrophages after combination therapy, n=3 independent biological replicates per group. **e**, Gene expression heatmap for CD45<sup>+</sup> immune cells before and after treatment for all treatment groups. **f** Feature plots showing the expression levels of murine immune cell marker genes-*Cd3e*, *Cd4*, *Cd8a*, *Cd19*, *Cd68*, *S100a8*, *Itgax*, in all 4 treatment groups. **g**, GOBP analysis of *S100a8*<sup>+</sup> neutrophils that increase in T12 tumors after single agent PXB treatment.

### Supplemental Figure 3. TAMs in responsive (T12) and non-responsive (T11) tumors are phenotypically distinct.

**a**, Heatmap showing top 10 upregulated genes per TAM sub-cluster for T12 and T11. **b**, IHC showing elevated pMAPK signaling in T11 tumors pre-treatment. **c**, Quantification of additional TAM marker genes. **d**, Heatmap representing top

upregulated and downregulated metabolic pathways in T12 TAMs. **e**, qPCR analysis of T12, T11 and 2151R tumors using select genes related to oxidative phosphorylation (n=3 independent biological replicates per tumor model, p value calculated using two-sided T test).

**Supplemental Figure 4. Combination therapy leads to polyclonal expansion T cells that exhibit memory cell phenotypes.** **a**, Gene expression heatmap top genes for each *Cd8+* T cell sub-cluster **b**, Feature plots showing the expression of select memory/exhaustion/activation markers in *Cd8+* T cells. **c**, V(D)J analysis of *Cd8+* T cells for all 4 treatment groups showing polyclonal expansion of *Cd8+* T cells after combination treatment. **d**, Treatment schema depicting treatment for mice bearing T12 lung metastasis. **e, f**, Representative images and quantification of surface metastatic lung nodules in all 4 treatment groups-PBS, PXB, CTX, CTX+PXB, n= 5-6 animals per group, p < 0.05). **d**, Schema for T12 rechallenge experiments and treatment. **e,f**, Quantification of mice that completely or partially (tumor volume < 50 % of control tumors) rejected T12 mammary tumors injected into the contralateral mammary gland of previously treated T12 tumor bearing mice, n=10. **g**, Images of visible lung metastatic nodules following Veh, PXB, CTX and CTX+PXB. **h**, Immunohistochemistry of T12 macro and micro-metastatic lung lesions for H&E, F480+ TAMs, B220+ B cells and CD4/8+ T cell markers following 30-day treatment of GEMMs. **i**, Quantification of immunohistochemistry showing % positivity of F480, B220, CD4 and CD8 following PBS, PXB, CTX and CTX+PXB.

**Supplemental Figure 5. Cd4+ T cell and B cell play an important role in mediating long term tumor regression.** **a**, Heatmap showing top upregulated genes per *Cd4+* T cell sub-cluster. **b**, Feature plots showing the expression of select memory/exhaustion/activation markers in CD4+ T cells across all 4 treatment groups. **c**, Clonal frequency of *Cd4+* T cells in all 4 treatment groups and chord diagrams representing unique V-J region pairings in *Cd4+* T cells in T12 tumors before and after treatment.

**Supplemental Figure 6. Activated B cells expand after combination therapy and may be the main APCs within the tertiary lymphoid structures.** **a**, Heatmap showing highly expressed genes in every B cell sub-cluster. **b**, REACTOME analysis of *Cd86+* Activated B cells (ABCs) expanded after combination treatment. **c**, H&E and IHC images of TLS using T cell (CD4+ or CD8+) and B cell (CD19+) markers. **d**, Quantification of TLS in all 4 treatment groups in T12 tumors (p < 0.05). P value was computed using two-sided T test. **e**, Representative imaging mass cytometry images as well as single channel images depicting the localization of HEV marker Endomucin with B220+ B cells and CD4+ T cells withing TLS.

**Supplemental Figure 7. T12 TAM signature is upregulated in patients with Claudin-low breast cancer in all and TNBC only patient samples.** **a**, Downregulation of T11 TAM signature in all claudin-low breast cancer patients in SCANB, TCGA and METABRIC clinical trial datasets. **b**, Upregulation of T12 TAM signature in all claudin-low breast cancer patients in SCANB, TCGA and METABRIC clinical trial datasets.

**Supplementary Table 1. List of primer sequences used in qPCR analysis.**

**Supplementary Table 2. a**, List of T11 vs T12 Signature Genes derived from single cell RNA

sequencing data for CD68+ Myeloid Cells. **b**, List of T12 vs T11 Signature Genes derived from single cell RNA sequencing data for CD68+ Myeloid Cells.

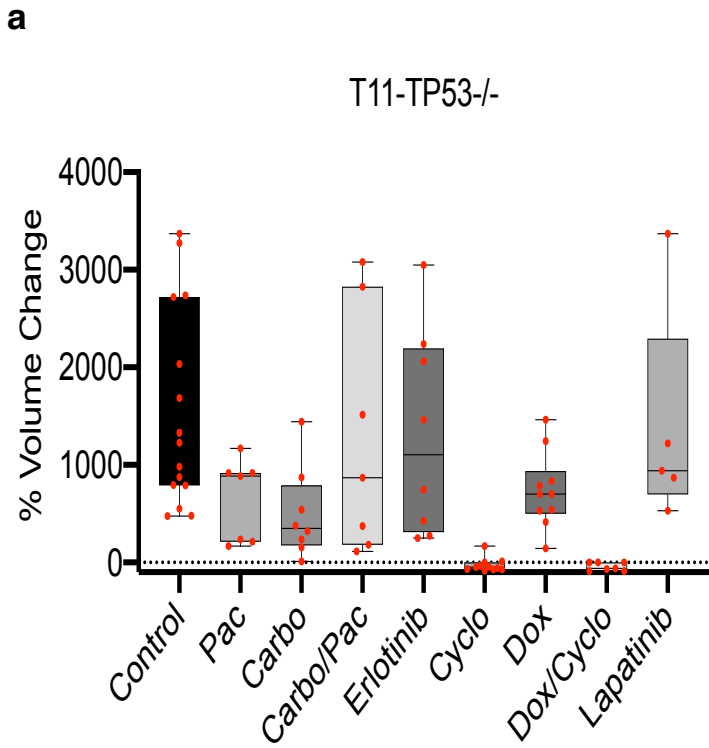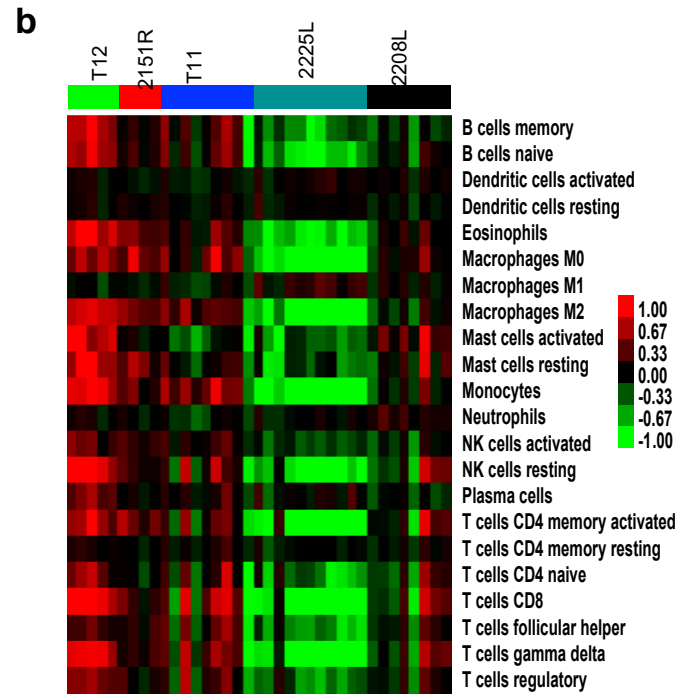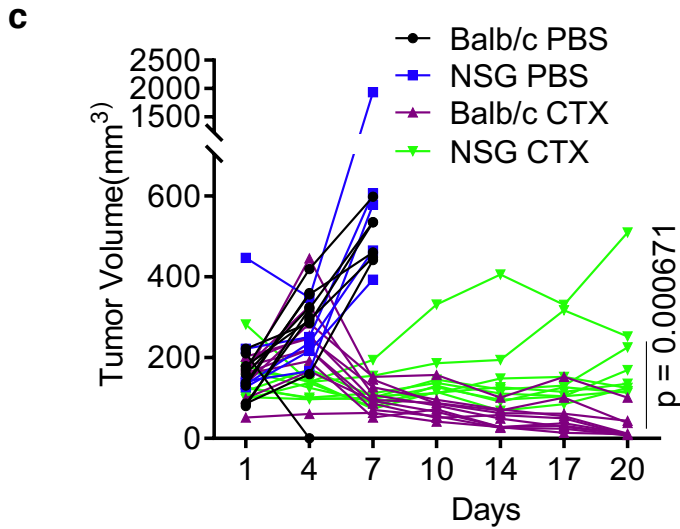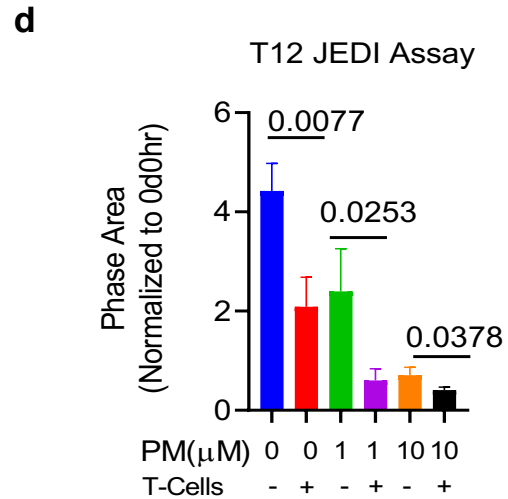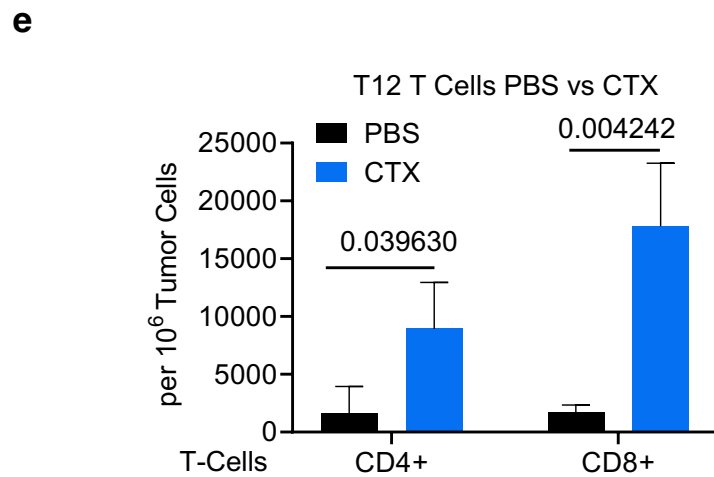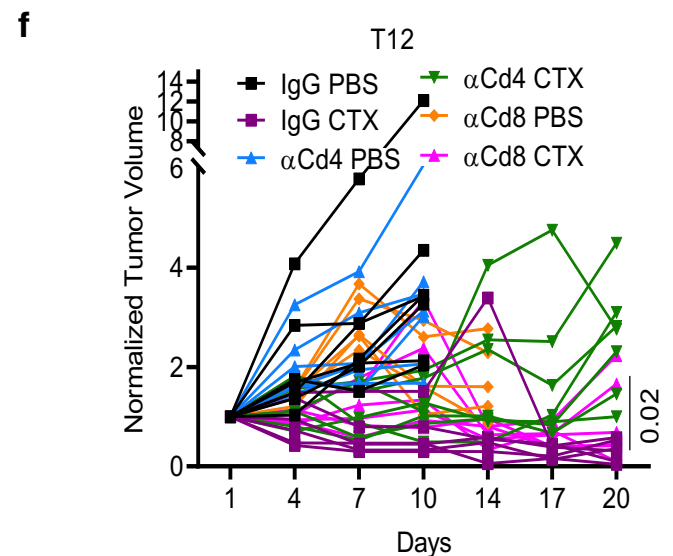

**g**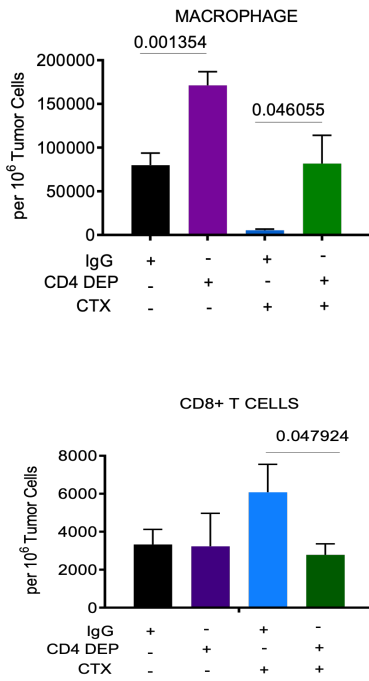**h**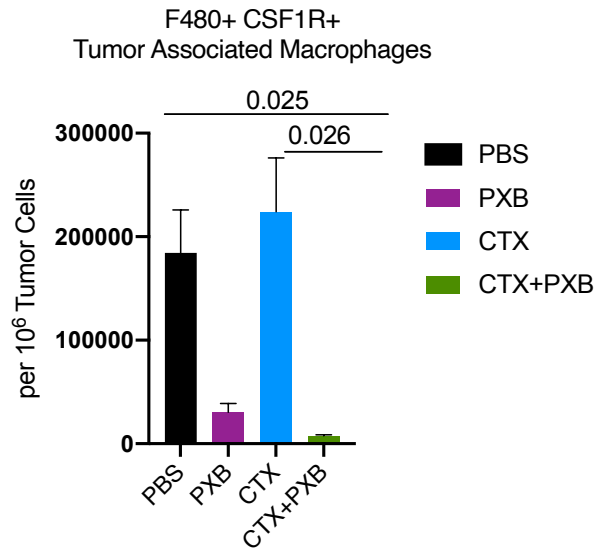**i**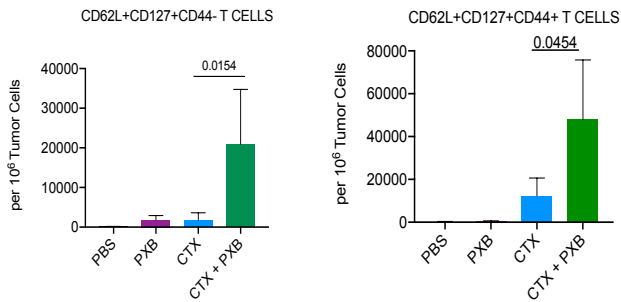**j**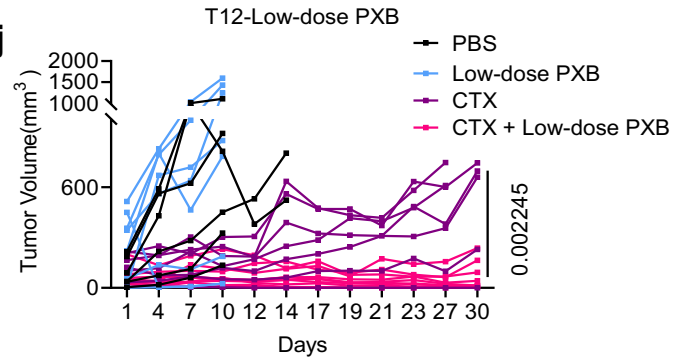**k**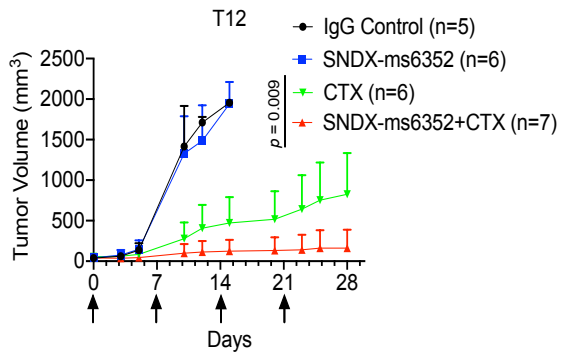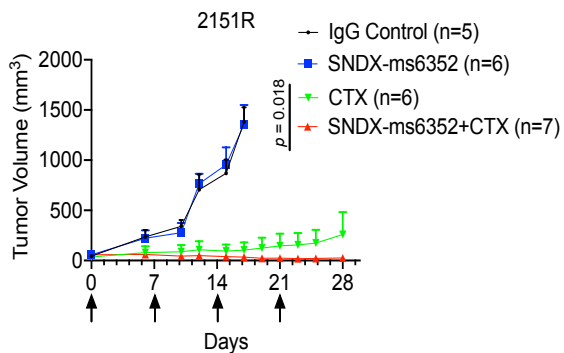**l**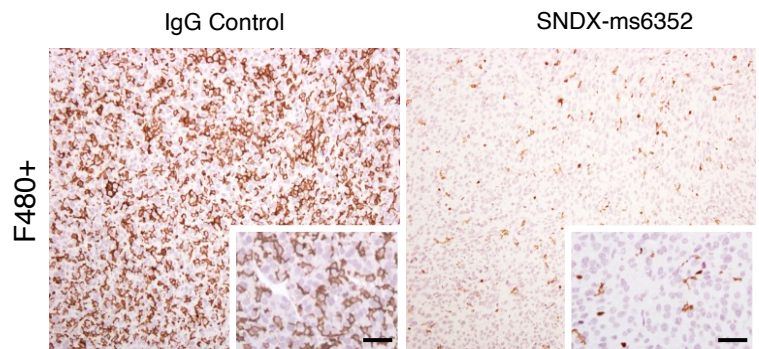

**a**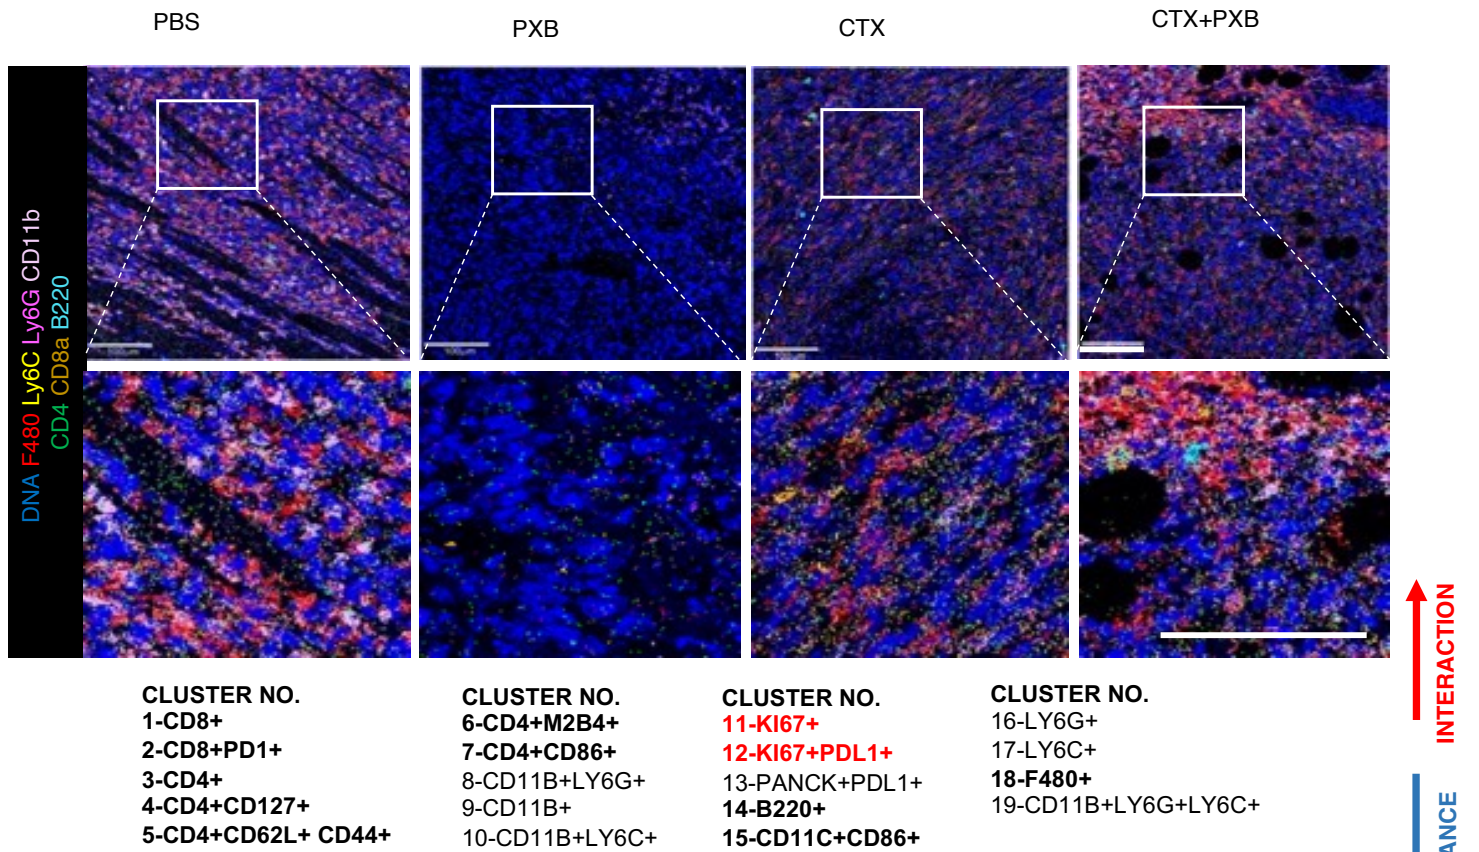**b**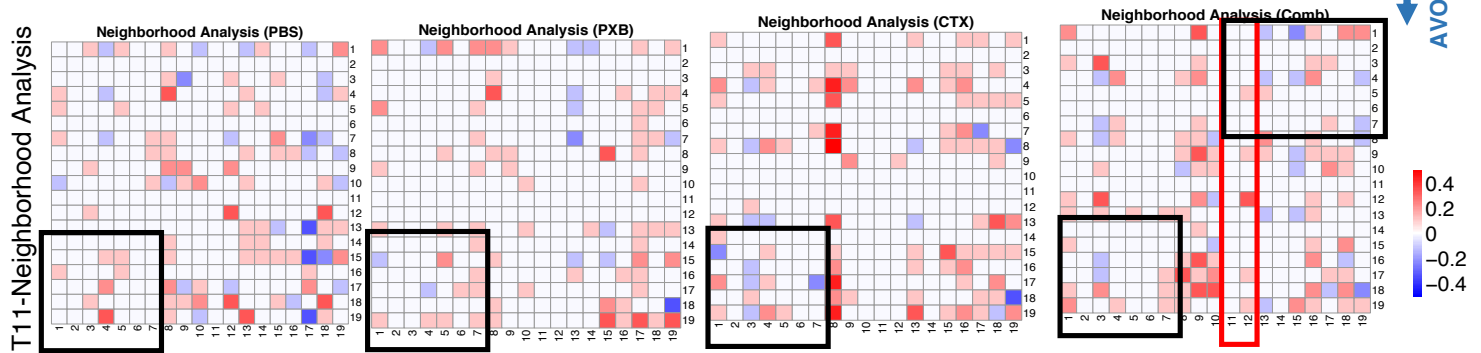**c**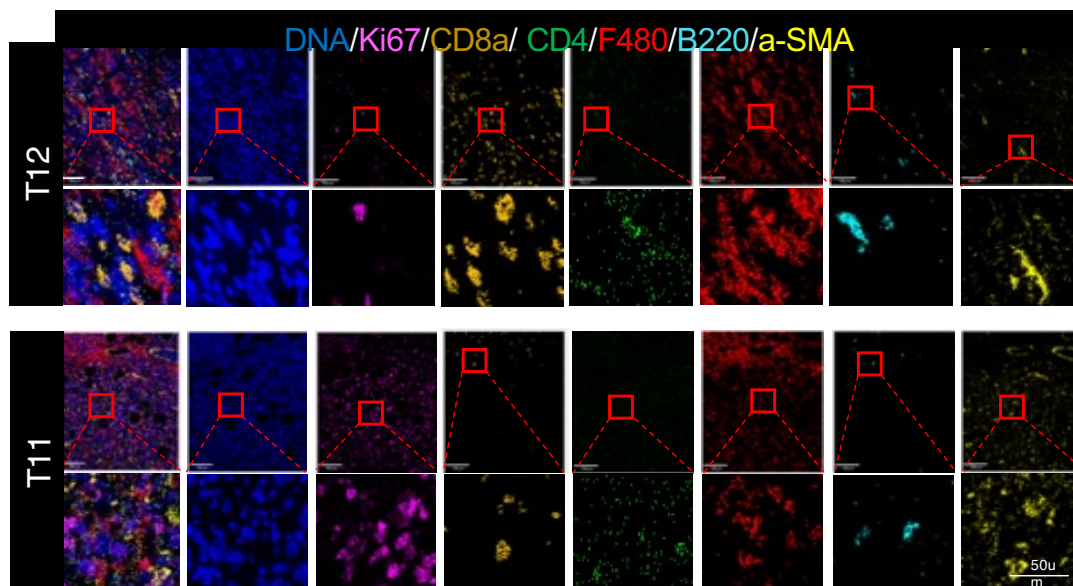**d**

No of F480+ CSF1R+ TAMS  
post CTX+PXB

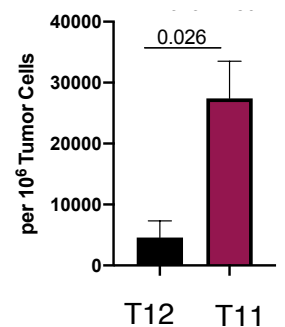

e

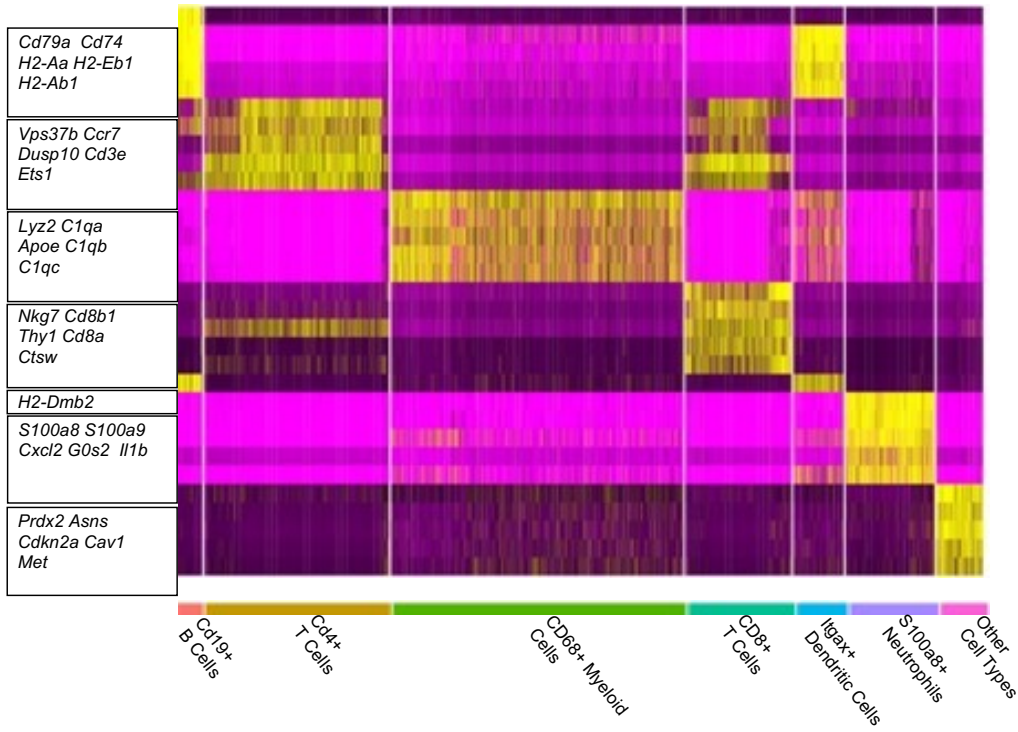

f

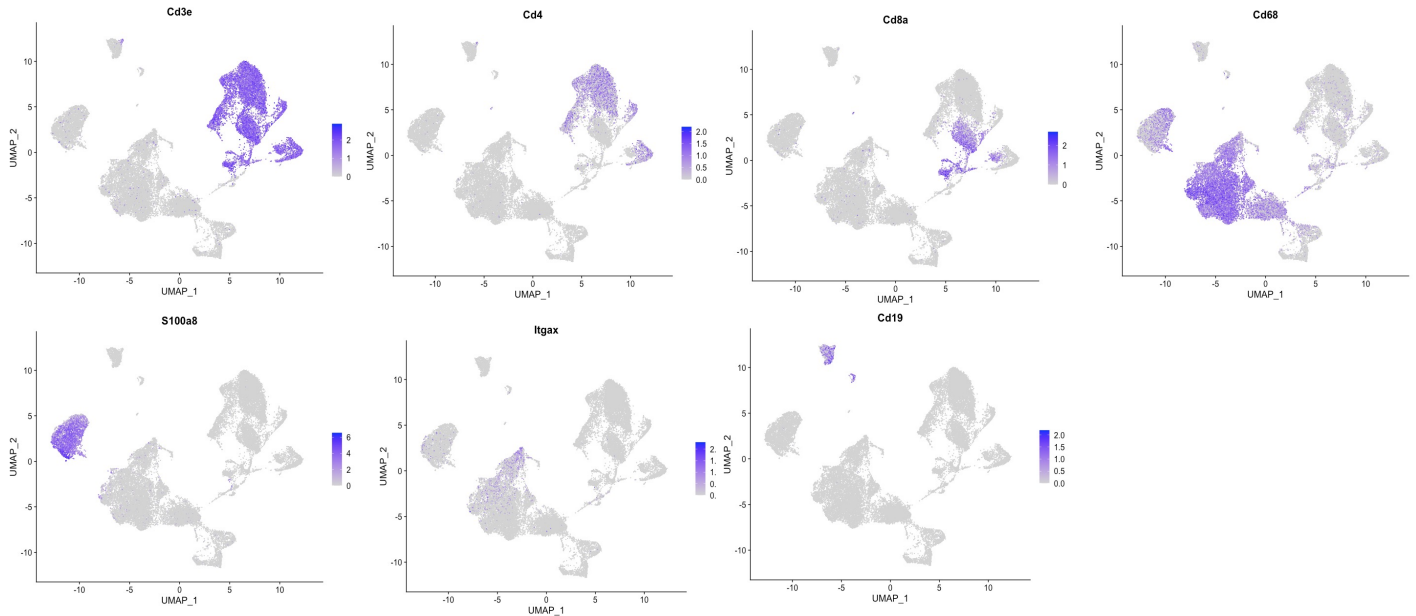

Go Analysis Biological Processes-  
S100a8+ Neutrophils

g

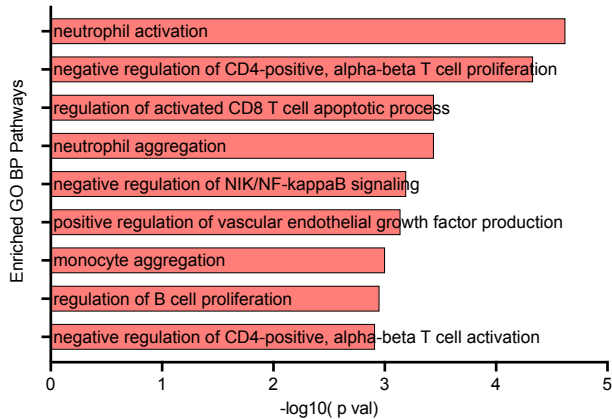

**a**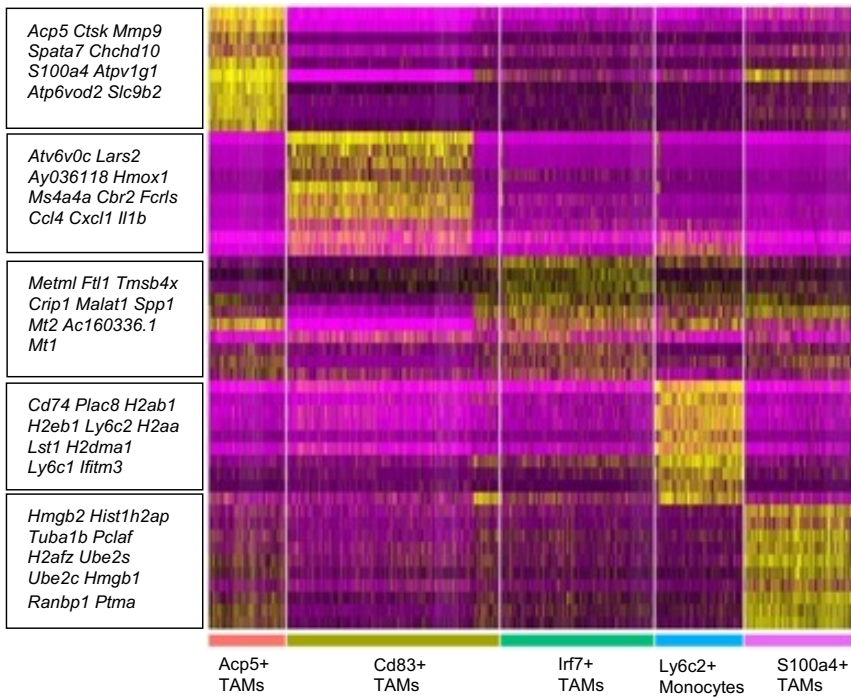

T12

T11

**b**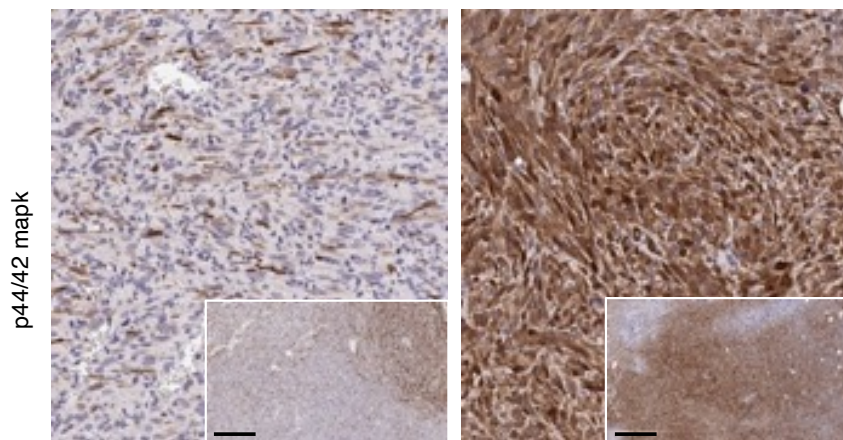

p44/42 mapk

**d**

Pathways Analysis  
T12 Cd68+ Myeloid Cells

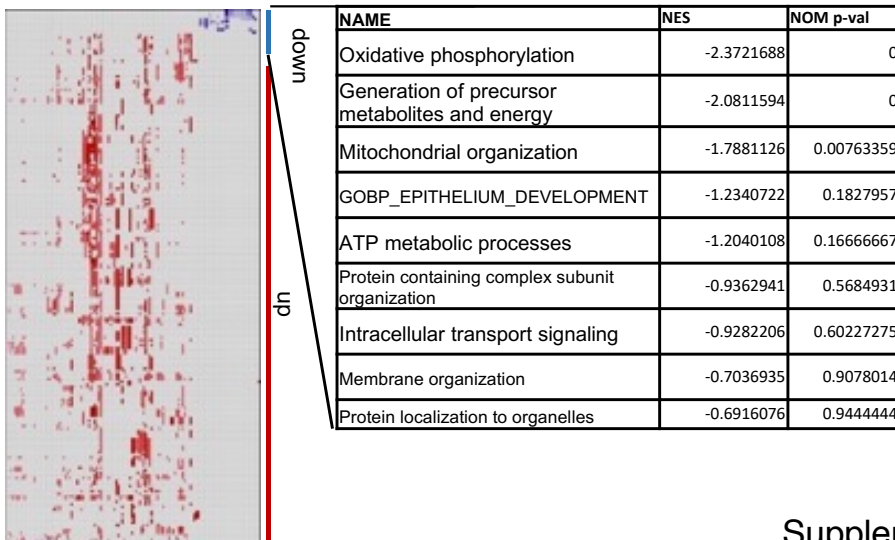**c**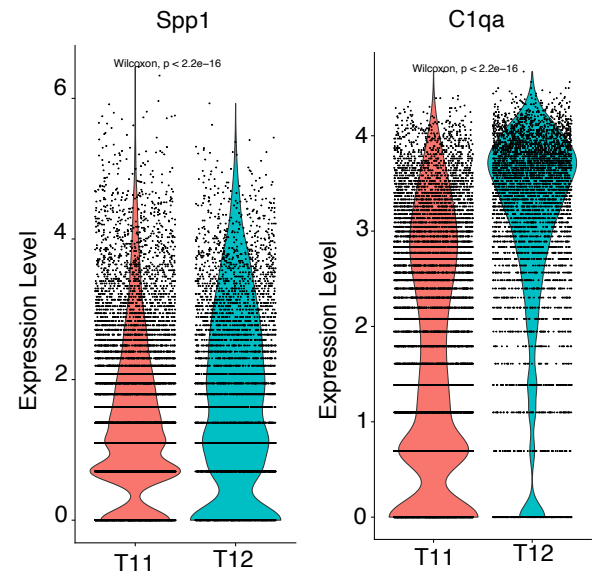**e**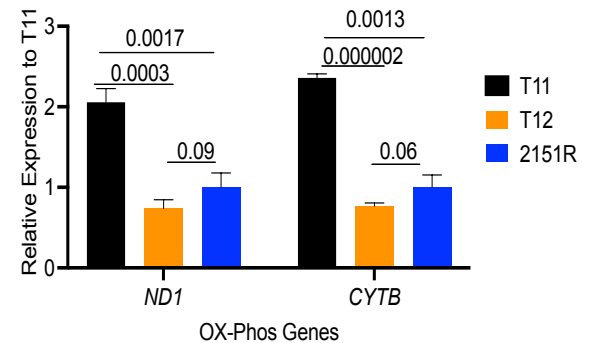



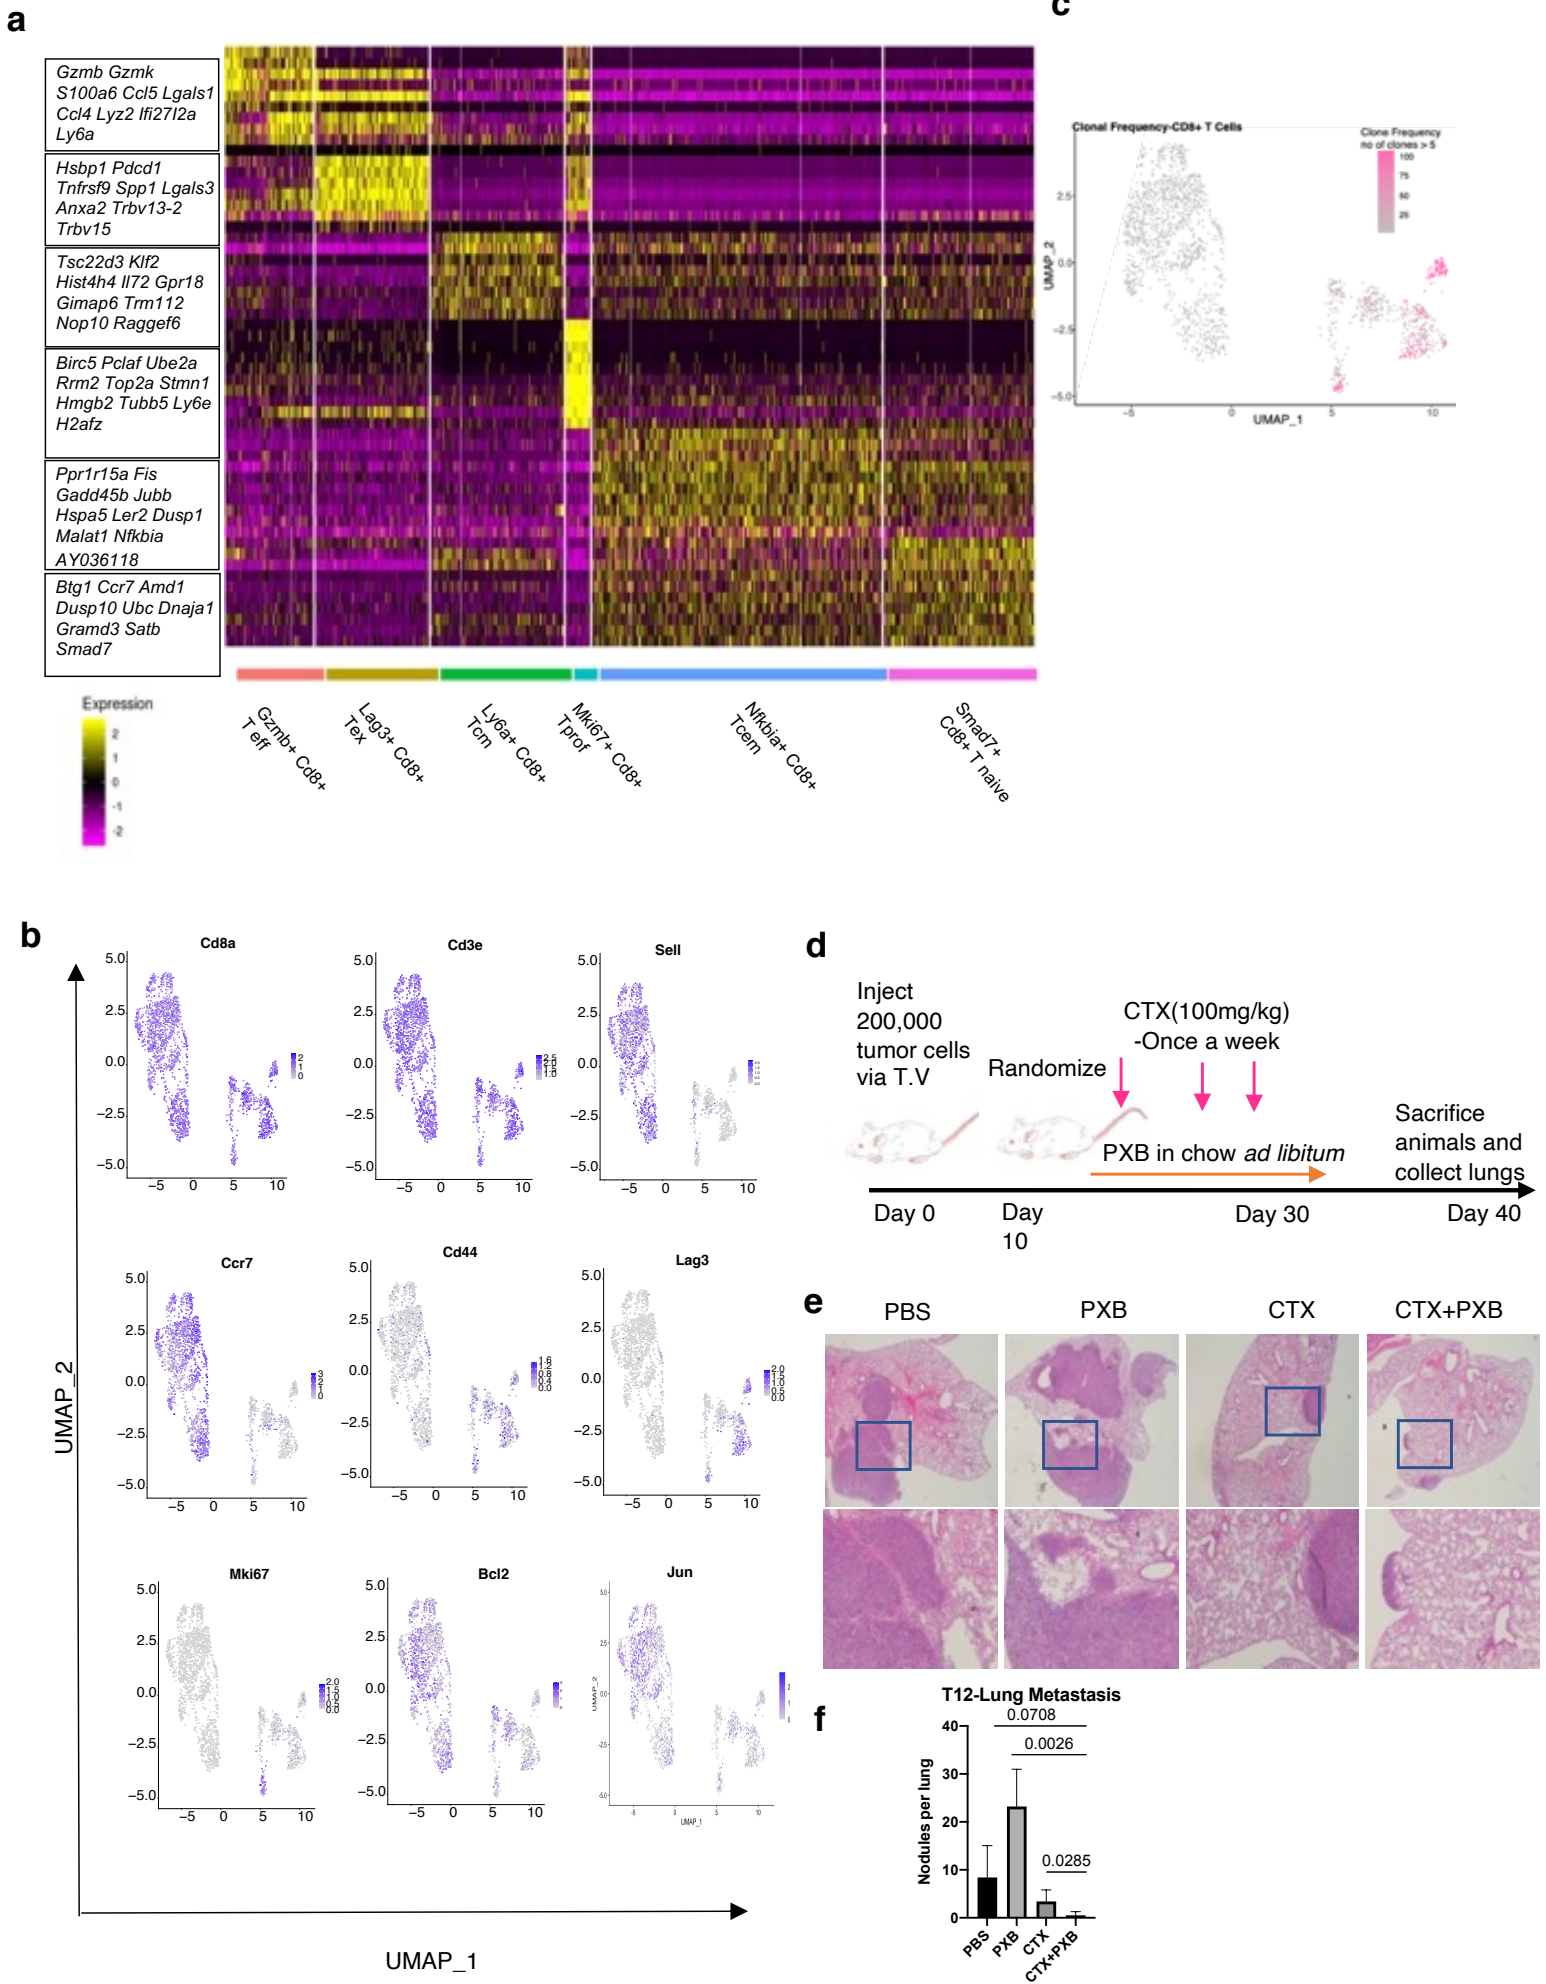

Supplementary Figure 4 for Figure 4, Singh et al.

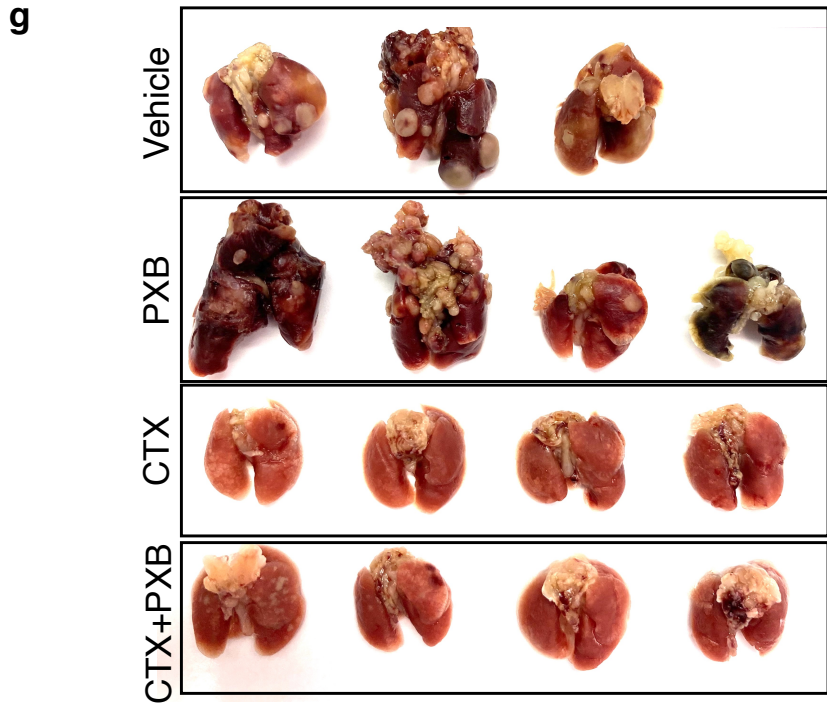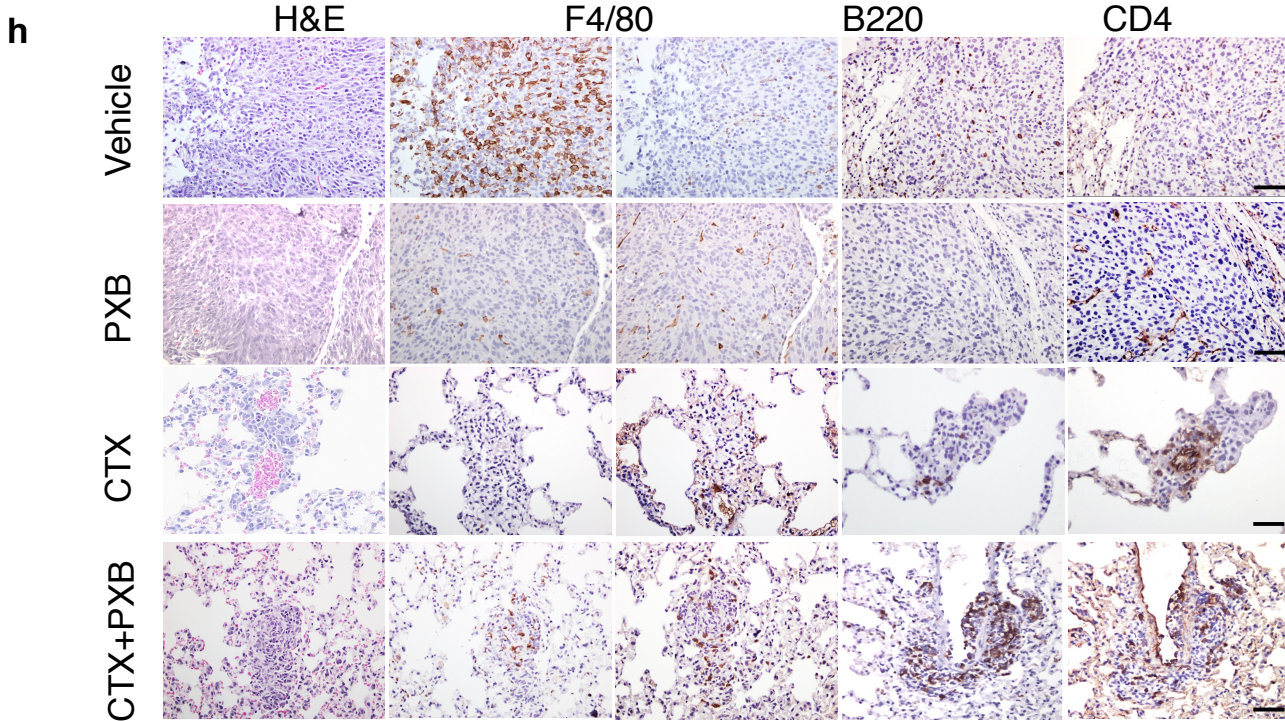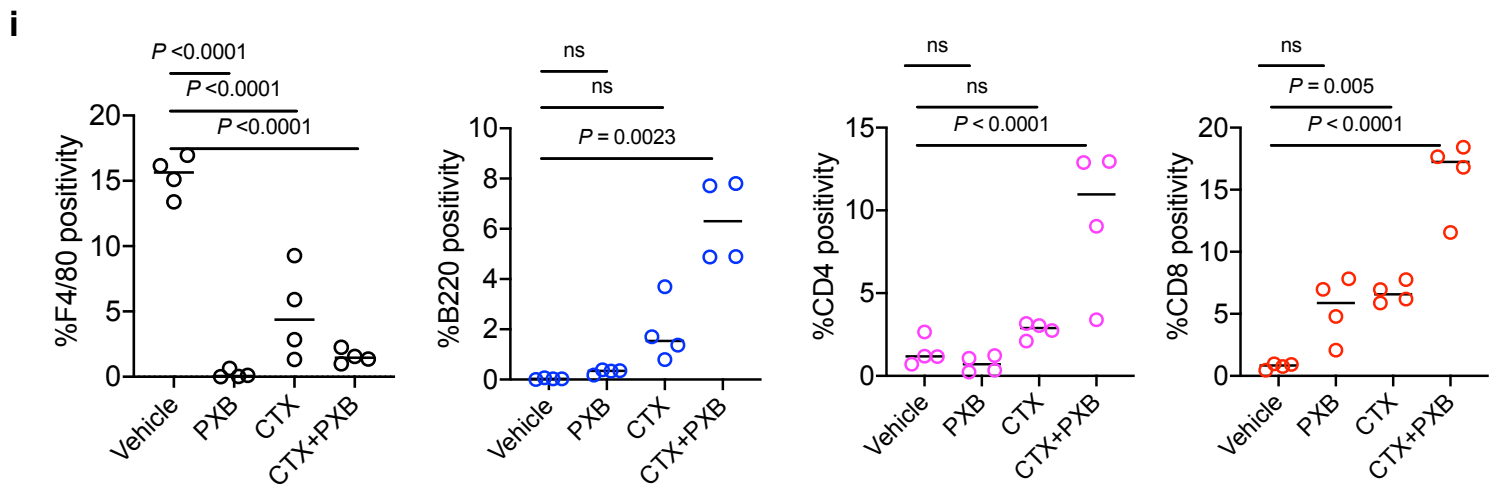

Supplementary Figure 4-2 for Figure 4, Singh et al.

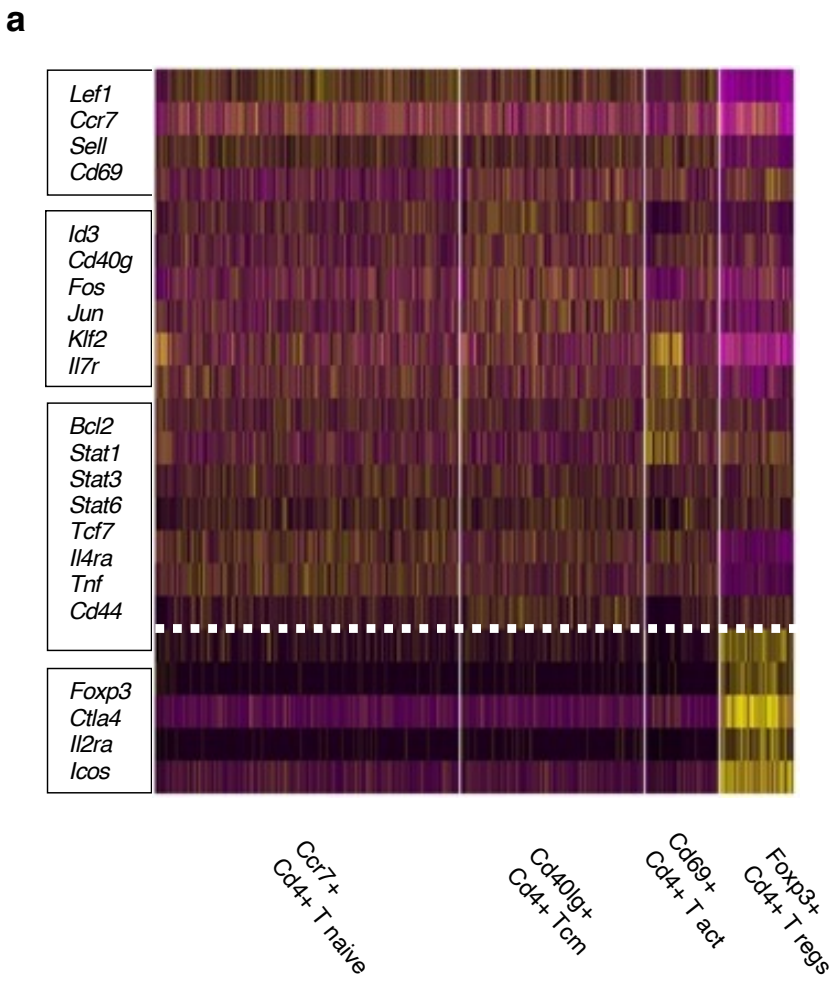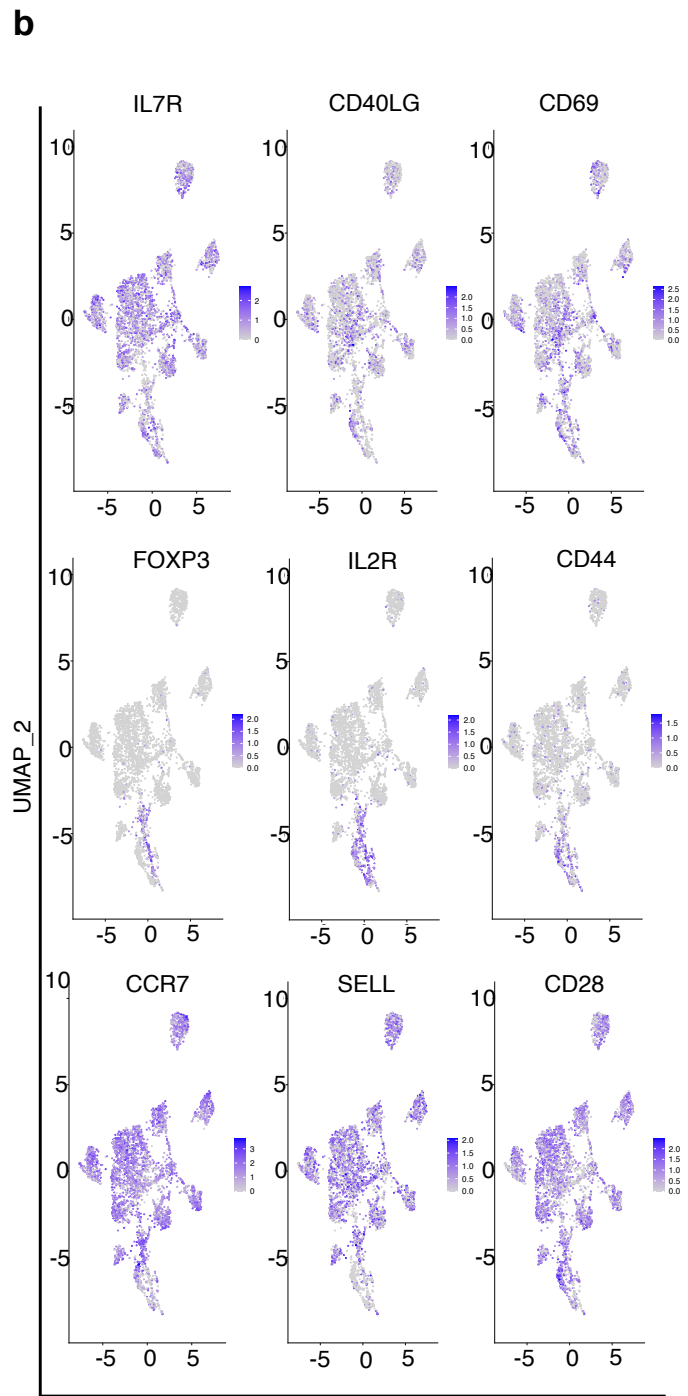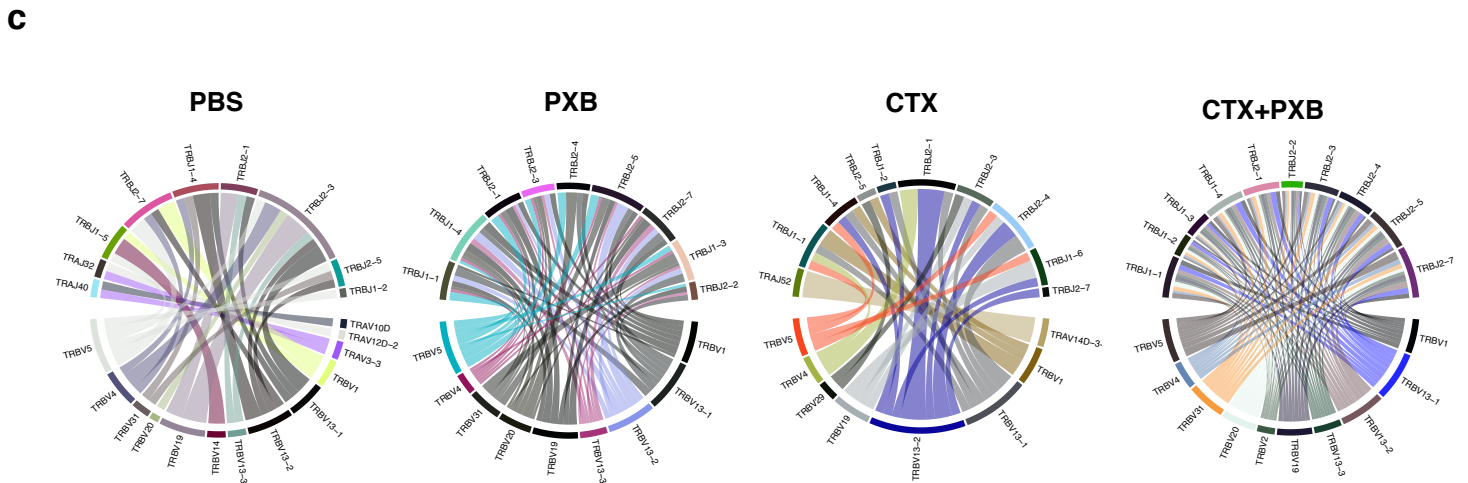

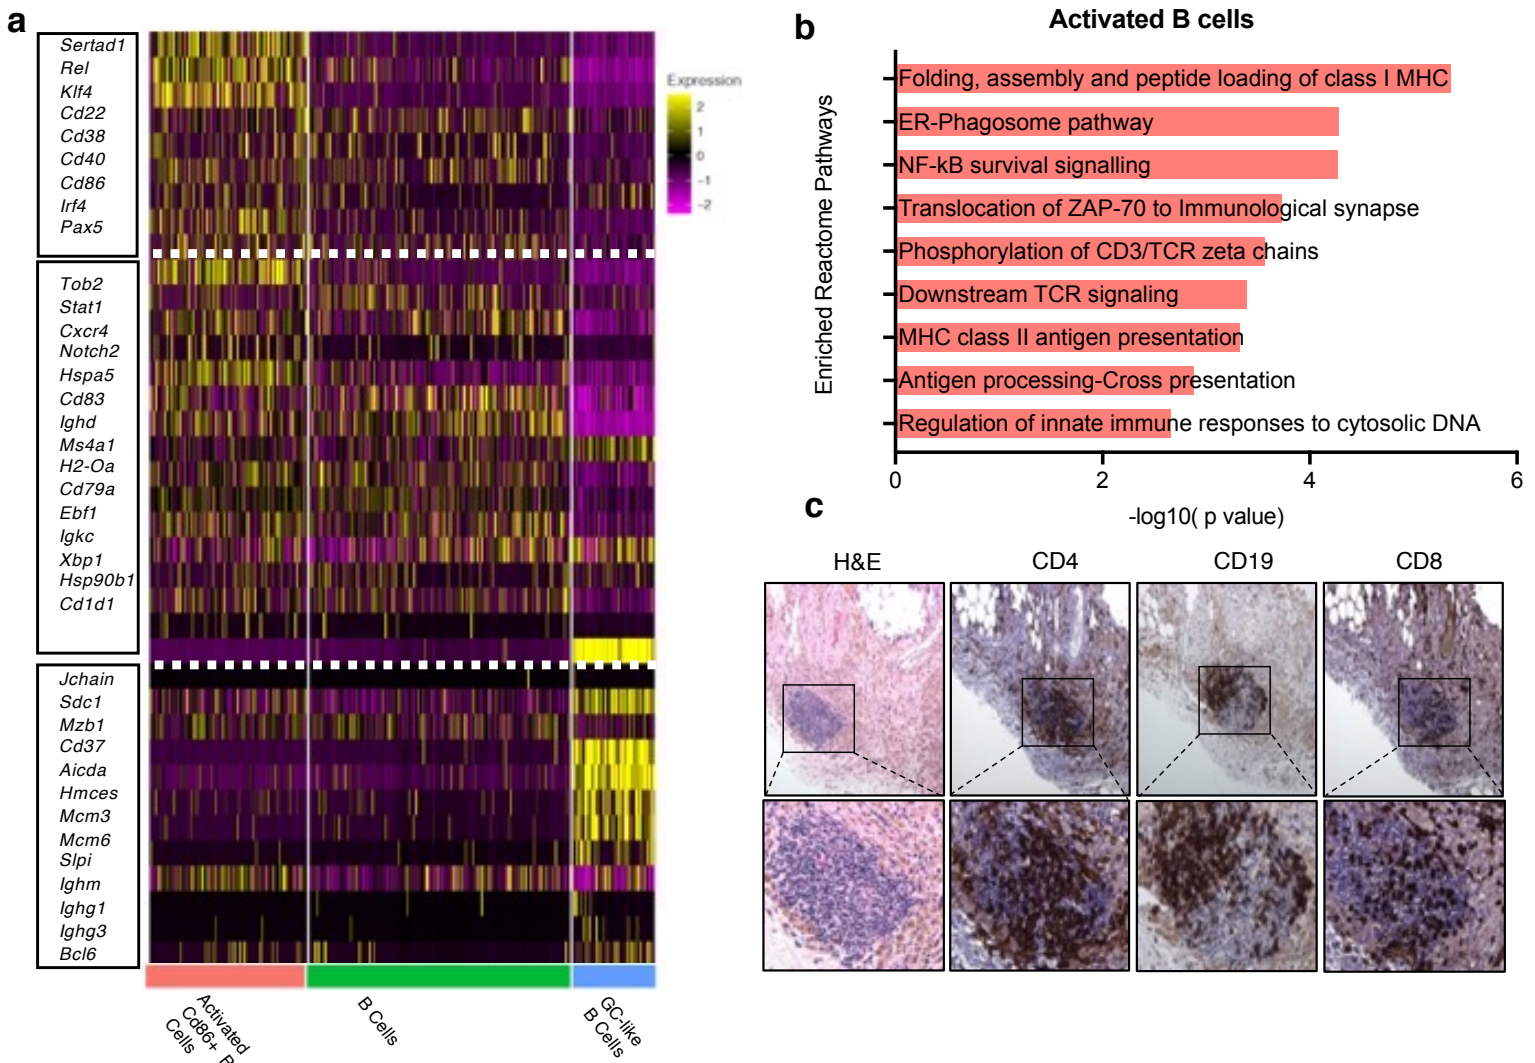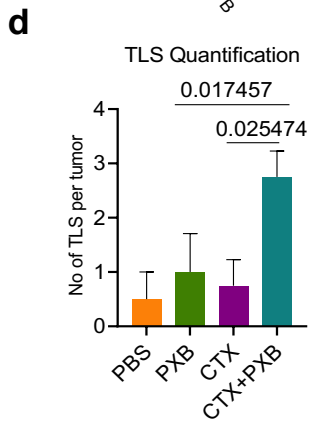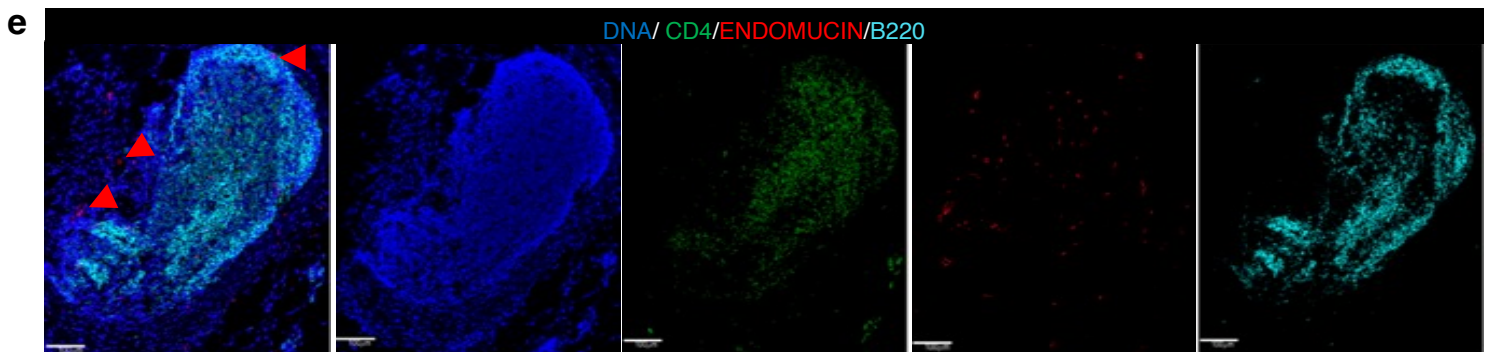

**a****T11 TAM Signature****SCANB**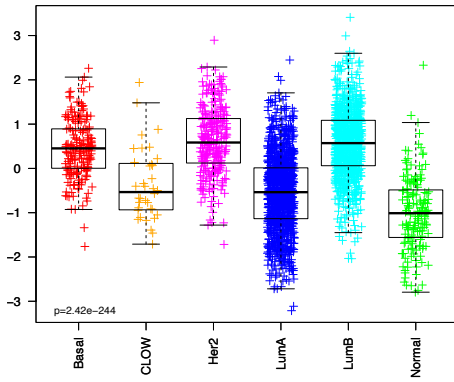**TCGA**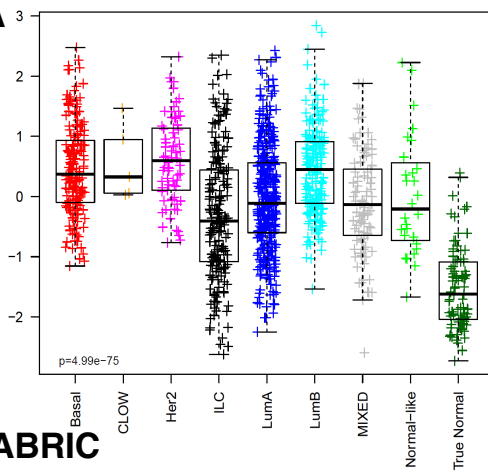**METABRIC**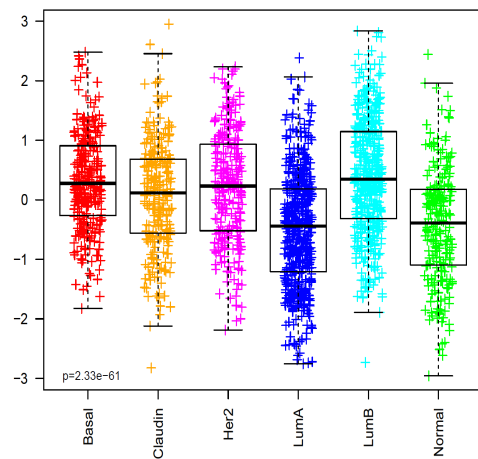**b****T12 TAM Signature**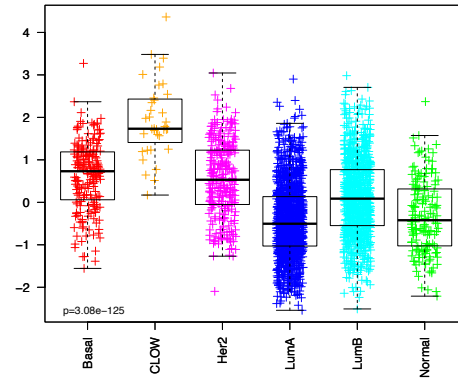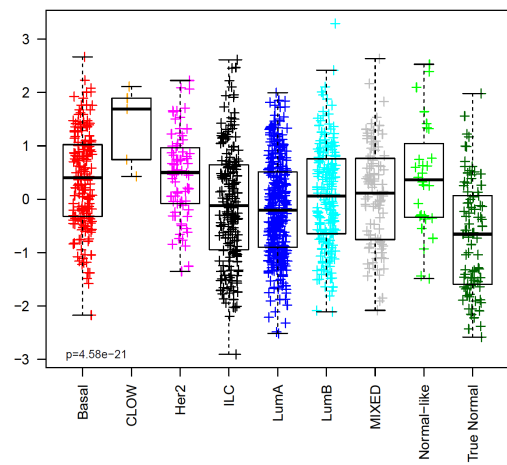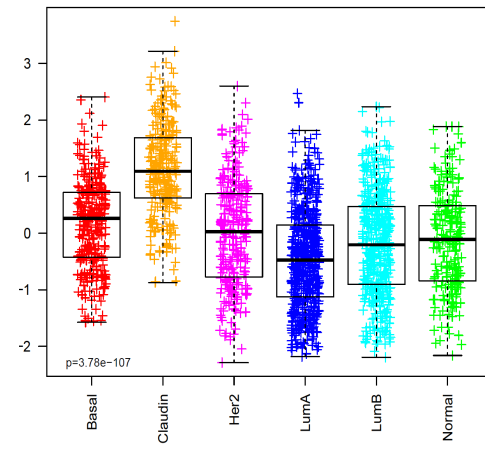

Supplement: NIHMS1801941-supplement-Supplementary_Figures.pdf [file NIHMS1801941-supplement-Supplementary_Figures.pdf]
